# Supplementary material
Source: publisher figshare collection journal article supplement (https://aacr.figshare.com/articles/dataset/_/22431776)
Supplement: Supplementary file 1 [file 39878141]

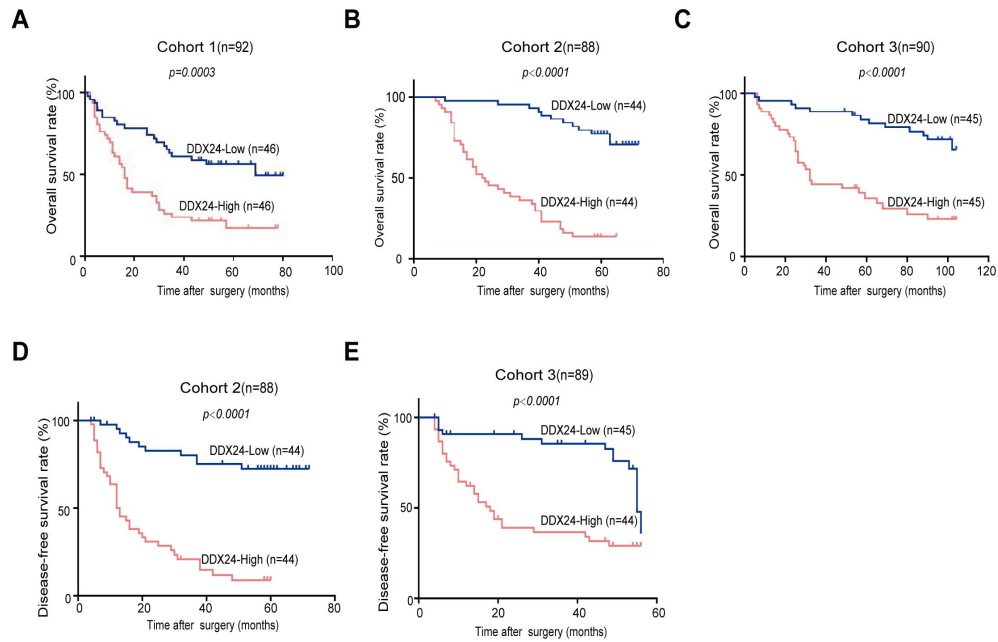

24

25

26

27 **Supplementary Figures 1. A-C** Kaplan-Meier analysis of overall survival (OS)  
 28 performed according to the DDX24 protein levels in cohorts 1 (A), 2 (B), and 3 (C),  
 29 respectively. **D-E** Kaplan-Meier analysis of disease-free survival (DFS) performed  
 30 according to the DDX24 protein levels in cohorts 2 and 3, respectively.

31

32

33

34

35

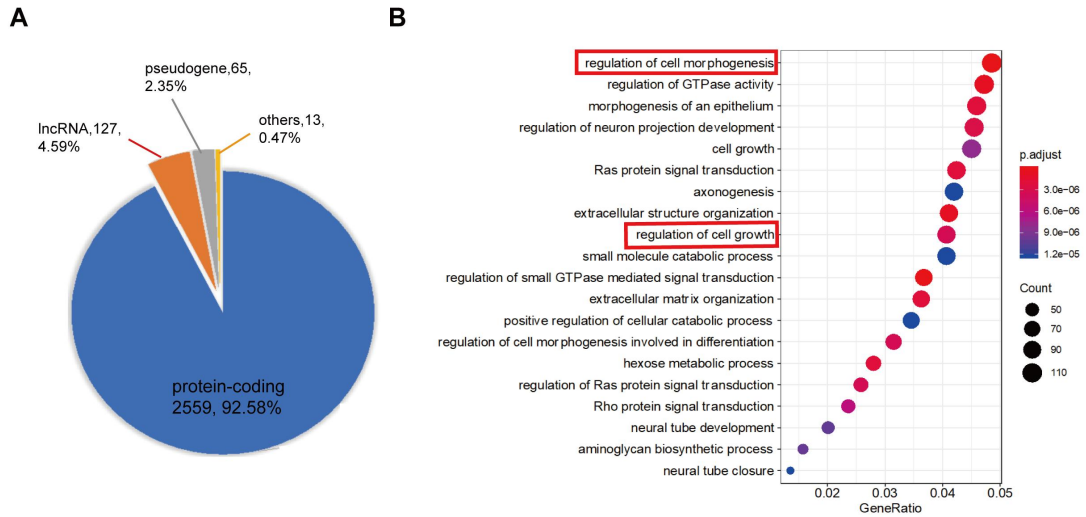

36

37 **Supplementary Figure 2. Analysis of RIP-seq using DDX24 antibody. A** Pie chart

38 displayed the RNA distribution from RIP-seq using DDX24 antibody. **B** The top 20 of

39 enriched pathway from RIP-seq.

40

41

42

43

44

45

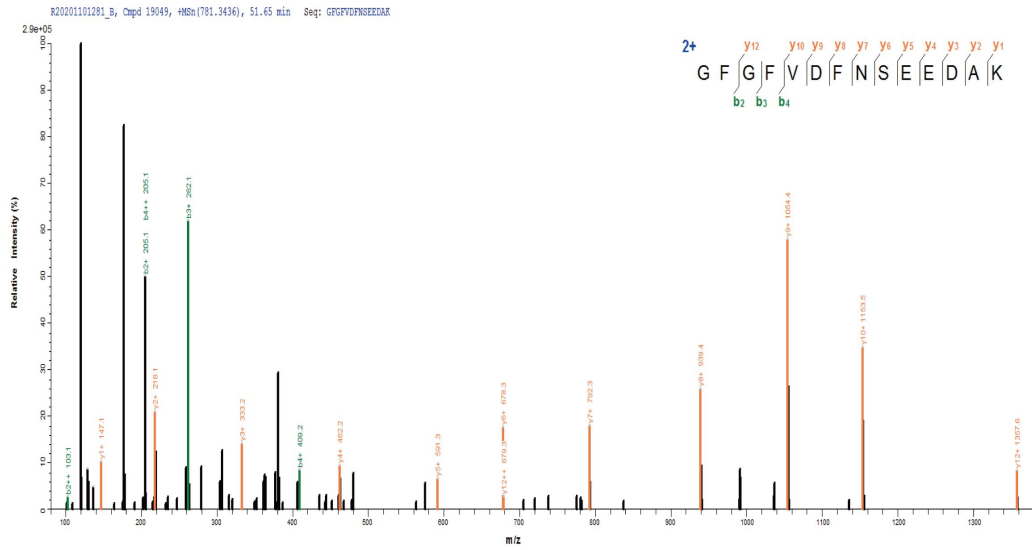

46

47 **Supplementary Figure 3. The putative DDX24 targeted protein sequence.**

48 MALDI-TOF/TOF mass spectrometry that was used to identify the putative DDX24

49 targeted protein sequence was GFGFVDFNSEEDAK. The assigned b and y ion peaks

50 on the spectrum are marked with their corresponding m/z values.

51

52

53

54

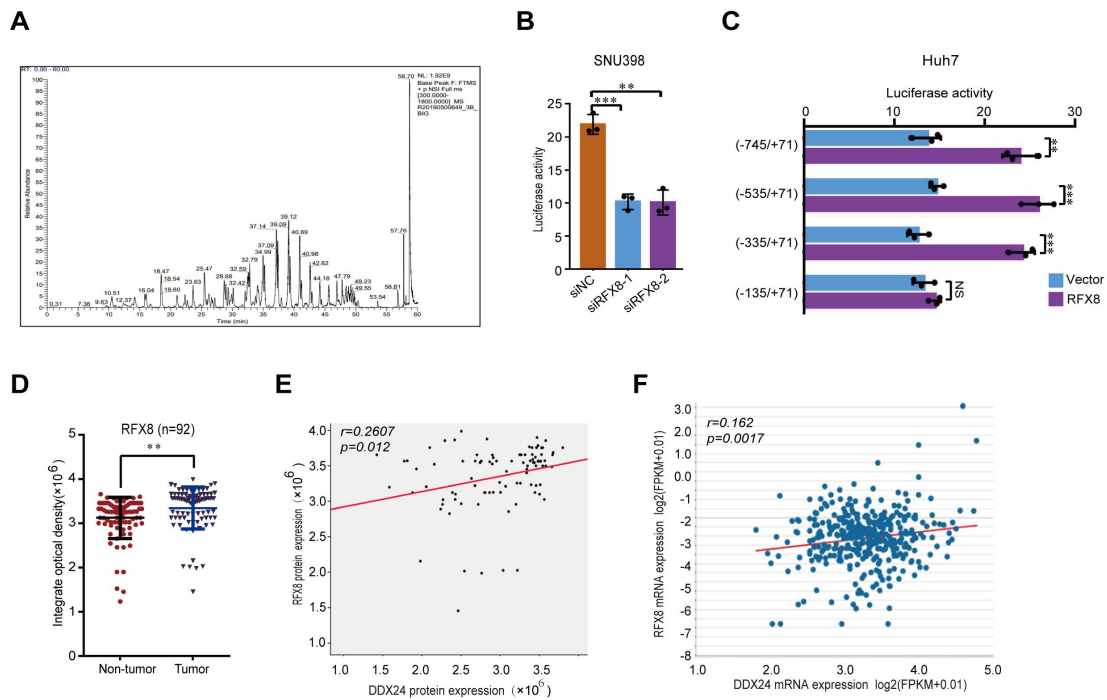

55

56 **Supplementary Figure 4. MALDI-TOF/TOF mass spectrometry identifying the**

57 **putative DDX24 promoter targeted protein sequence. A** The peak figure of the

58 putative DDX24 promoter-binding protein from MALDI-TOF/TOF mass

59 spectrometry. **B** Relative DDX24 promoter activity in SNU398 cells with RFX8

60 knockdown was determined by dual-luciferase assay. **C** Dual-luciferase reporter

61 assays to determine RFX8 binding region. **D** Expression analysis of RFX8 from the

62 92 HCC tissues and non-tumor tissues (cohort 1). **E** Correlation between RFX8 and

63 DDX24 expression in 92 HCC tissue samples (cohort 1). **F** Correlation between

64 RFX8 and DDX24 expression in 374 HCC patient tissues from the TCGA database.

65 The results are shown as means  $\pm$  SD, \* $p < 0.05$ , \*\*  $p < 0.01$ , \*\*\*  $p < 0.001$ , NS = not

66 significant.

67

68

69

**Supplementary Table 1. Primer sequences used in the study**

| <b>Primer name</b>                             | <b>Primer sequences</b>                     |
|------------------------------------------------|---------------------------------------------|
| Primers for real-time PCR:                     |                                             |
| DDX24                                          | Purchased from GeneCopoeia,<br>Hs-QRP-23370 |
| RFX8                                           | Purchased from GeneCopoeia,<br>Hs-QRP-23954 |
| Flag- sense                                    | 5'- AAGTCCGTTCACTCCTAAAGG -3'               |
| Flag- antisense                                | 5'- TCATCGTCATCCTTGTAAGTCGA -3'             |
| LAMB1-sense                                    | 5'- ATTCCTGGAGGGAATCCTTG -3'                |
| LAMB1-antisense                                | 5'- TCATTGCTTAAGCCCCAGTG -3'                |
| ITPR1-sense                                    | 5'- ACAGCACCACAGACGCAGT -3'                 |
| ITPR1-antisense                                | 5'- ATTACGGTCCCCAGCAATTT -3'                |
| CRIM1-sense                                    | 5'- GCAATCCCTTTGAGTTTCCA -3'                |
| CRIM1-antisense                                | 5'- CTTCAGGACAACGTGGAGAGA -3'               |
| FBN1-sense                                     | 5'-GGCTACCTCCAGCACTACCA -3'                 |
| FBN1-antisense                                 | 5'- ACATGCACTTGTAGCTCCCC -3'                |
| FBN2-sense                                     | 5'- AATCGGAAGCTTCAAATGCC -3'                |
| FBN2-antisense                                 | 5'- CAGGAGAAATCCTGCACTCG -3'                |
| TRIO-sense                                     | 5'- CTGGAAGACCGGATTCAAGA -3'                |
| TRIO-antisense                                 | 5'- AGCTCCTCCAGCCACGTC -3'                  |
| DYNC1H1-sense                                  | 5'- GTATGCAGAGCCGCTCACTG -3'                |
| DYNC1H1-antisense                              | 5'- CACCTAGTCATTTACGGGG-3'                  |
| NC(SEC62)-sense                                | 5'- ACCAATATGATGGGTCACCG -3'                |
| NC(SEC62)-antisense                            | 5'- GCCTTTGCCCACTTTGAATC -3'                |
| Primers for RT-PCR:                            |                                             |
| Fragment-1 of DDX24 promoter region-sense      | 5'- AAGTGAGAGATGTGCGACTC -3'                |
| Fragment-1 of DDX24 promoter region -antisense | 5'- ACGTGTGATGAGTGTTTCCTTGT -3'             |
| Fragment-2 of DDX24 promoter region -sense     | 5'- AGGAACACTCATCACACGTC -3'                |
| Fragment-2 of DDX24 promoter region -antisense | 5'- GCTCCCGCACAGTAACGTA -3'                 |
| Fragment-3 of DDX24 promoter region -sense     | 5'- AACTTACGTTACTGTGCGGG -3'                |
| Fragment-3 of DDX24 promoter region -antisense | 5'- TCCCGCCCCTATGGCAAA -3'                  |
| Fragment-4 of DDX24 promoter region -sense     | 5'- GGTAGCTGAGTTTGCCATAGG -3'               |
| Fragment-4 of DDX24 promoter region -antisense | 5'- CGAGTGAAGAACCTCAGAAAC -3'               |

71

72

**Supplementary Table 2. The characteristics of antibodies**

| <b>Protein</b> | <b>Application</b> | <b>Origin</b>                        | <b>City/State/Country</b> | <b>Dilution</b>             |
|----------------|--------------------|--------------------------------------|---------------------------|-----------------------------|
| DDX24          | WB, IF             | A300697A,<br>Bethyl<br>Laboratories  | Montgomery/TX/USA         | 1:1000 &<br>1:200           |
| DDX24          | IHC, IP            | HPA002554,<br>Sigma-Aldrich          | St Louis/MO/USA           | 1:50                        |
| RFX8           | WB, IHC, IF        | TA330886,<br>OriGene<br>Technologies | Rockville/MD/USA          | 1:1000 &<br>1:50 &<br>1:200 |
| LAMB1          | WB, IHC            | GTX100787,<br>Genetex                | San Antonio/TX/USA        | 1:1000 &<br>1:100           |
| p-SRC          | WB                 | 44-660G,<br>ThermoFisher             | Rockford/IL/USA           | 1:1000                      |
| SRC            | WB                 | #2109S, CST                          | Danvers/MA/USA            | 1:1000                      |
| Histone H3     | WB                 | #4499S, CST                          | Danvers/MA/USA            | 1:1000                      |
| $\beta$ -actin | WB                 | #4970S, CST                          | Danvers/MA/USA            | 1:1000                      |
| GAPDH          | WB                 | #5174S, CST                          | Danvers/MA/USA            | 1:1000                      |
| NCL(Nucleolin) | WB                 | #14574, CST                          | Danvers/MA/USA            | 1:1000                      |
| NCL(Nucleolin) | IP                 | #14574, CST                          | Danvers/MA/USA            | 1:50                        |
| FLAG           | IP                 | #14793, CST                          | Danvers/MA/USA            | 1:50                        |
| FLAG           | WB                 | #14793, CST                          | Danvers/MA/USA            | 1:1000                      |

73 WB, Western blotting; IF, Immunofluorescence staining; IP, immunoprecipitation; IHC,

74 Immunohistochemical (IHC) staining; CST, Signaling Technology

75

76

77 **Supplementary Table 3. Clinical characteristics of 11 HCC patients**

| Case | Gender | Age (years) | T stage | N stage | M stage | AJCC stage |
|------|--------|-------------|---------|---------|---------|------------|
| 1    | Male   | 49          | T2      | N0      | M1      | IVB        |
| 2    | Male   | 68          | T3      | N0      | M0      | IIIA       |
| 3    | Male   | 65          | T1b     | N0      | M0      | IB         |
| 4    | Male   | 60          | T3      | N0      | M0      | IIIA       |
| 5    | Male   | 49          | T1a     | N0      | M1      | IVB        |
| 6    | Female | 43          | T1a     | N0      | M0      | IA         |
| 7    | Male   | 60          | T1b     | N0      | M0      | IB         |
| 8    | Male   | 67          | T1a     | N0      | M0      | IA         |
| 9    | Male   | 77          | T1b     | N0      | M0      | IB         |
| 10   | Male   | 64          | T1b     | N0      | M0      | I          |
| 11   | Male   | 55          | T2      | N0      | M0      | IVB        |

78

79

80

81

82

83

84

85

86

87

88

89

90

91

92



**Supplementary Table 4. Clinical characteristics of 270 HCC patients.**

| Patient characteristics                     | Cohort 1  | Cohort 2 | Cohort 3  |
|---------------------------------------------|-----------|----------|-----------|
|                                             | Tissues   | Tissues  | Tissues   |
| No. of patients                             | 92        | 88       | 90        |
| Gender (male/female)                        | 83/9      | 72/16    | 80/10     |
| Age, years (mean, range)                    | 53, 25-73 | 53,27-84 | 52, 31-78 |
| Edmondson Grade (I+II/III+IV)               | 60/32     | 58/32    | 44/46     |
| AJCC Grade (1+2/3+4)                        | 51/41     | 88/0     | 88/2      |
| Liver Cirrhosis (present/absent)            | 36/56     | 76/12    | 81/9      |
| Tumor Size, cm ( $\leq 3$ / $> 3$ )         | 22/70     | 25/63    | 36/54     |
| T stage (T1+T2/T3+T4)                       | 51/41     | 88/0     | 87/3      |
| N stage (N1+N2/N3+N4)                       | 91/1      | -        | -         |
| M stage (M0/M1)                             | 90/2      | -        | -         |
| Portal Vein Tumor Thrombus (present/absent) | 84/8      | -        | -         |
| ALT, U/L ( $\leq 45$ / $> 45$ )             | -         | 48/40    | 59/31     |
| HBcAb (positive/negative)                   | -         | 77/11    | 81/9      |
| AFP ug/L ( $\leq 25$ / $> 25$ )             | -         | 27/61    | 38/52     |
| HBsAg (positive/negative)                   | -         | 75/13    | 71/19     |
| HCV (present/absent)                        | -         | 1/87     | 2/88      |
| TBIL, umol/L ( $\leq 20$ / $> 20$ )         | -         | 74/14    | 75/15     |
| Cirrhosis Nodules ( $\leq 3$ / $> 3$ )      | -         | 49/39    | 56/34     |
| Tumor Capsule (present/absent)              | -         | 45/43    | 42/48     |
| Tumor Recurrence (present/absent)           | -         | 52/36    | 49/41     |
| Tumor Number ( $\leq 1$ / $> 1$ )           | -         | 73/15    | 79/11     |

94

95

96

97

98

99

100

101

102 **Supplementary Table 5. Correlation between DDX24 expression and HCC**  
 103 **clinicopathologic features in 270 patients.**

|                 | DDX24 expression levels |                | <i>P</i>                  |
|-----------------|-------------------------|----------------|---------------------------|
|                 | high expression         | low expression |                           |
| Gender          |                         |                |                           |
| Male            | 123                     | 112            | <i>0.0463<sup>a</sup></i> |
| Female          | 12                      | 23             |                           |
| Age (years)     |                         |                |                           |
| ≤55             | 86                      | 76             | <i>0.2141</i>             |
| > 55            | 49                      | 59             |                           |
| Edmondson Grade |                         |                |                           |
| I+II            | 77                      | 85             | <i>0.3203</i>             |
| III+IV          | 58                      | 50             |                           |
| AJCC Grade      |                         |                |                           |
| 1+2             | 108                     | 119            | <i>0.0673</i>             |
| 3+4             | 27                      | 16             |                           |
| Tumor Size(cm)  |                         |                |                           |
| ≤3              | 33                      | 50             | <i>0.0249<sup>a</sup></i> |
| > 3             | 102                     | 85             |                           |
| T               |                         |                |                           |
| T1/T2           | 107                     | 119            | <i>0.048<sup>a</sup></i>  |
| T3/T4           | 28                      | 16             |                           |

104  
 105 <sup>a</sup>*p* values less than .05 were considered statistically significant.

106  
 107  
 108  
 109  
 110  
 111  
 112  
 113  
 114  
 115  
 116  
 117  
 118  
 119  
 120  
 121  
 122

123 **Supplementary Table 6. Correlation between DDX24 expression and HCC**  
 124 **clinicopathologic features in 92 patients: Cohort 1.**

|                            | DDX24 expression levels |                | <i>p</i>            |
|----------------------------|-------------------------|----------------|---------------------|
|                            | high expression         | low expression |                     |
| Liver Cirrhosis            |                         |                | 0.3928              |
| with                       | 16                      | 20             |                     |
| without                    | 30                      | 26             |                     |
| Portal Vein Tumor Thrombus |                         |                | 0.0264 <sup>a</sup> |
| No                         | 39                      | 45             |                     |
| Yes                        | 7                       | 1              |                     |

125 <sup>a</sup>*p* values less than .05 were considered statistically significant.

126  
 127  
 128  
 129  
 130  
 131  
 132  
 133  
 134  
 135  
 136  
 137  
 138  
 139  
 140  
 141  
 142  
 143  
 144  
 145  
 146  
 147  
 148  
 149  
 150  
 151  
 152

153 **Supplementary Table 7. Correlation between DDX24 expression and HCC**

154 **clinicopathologic features in 88 patients: Cohort2.**

|                   | DDX24 expression levels |                | <i>p</i>                      |
|-------------------|-------------------------|----------------|-------------------------------|
|                   | high expression         | low expression |                               |
| Liver Cirrhosis   |                         |                | <i>0.2140</i>                 |
| with              | 40                      | 36             |                               |
| without           | 4                       | 8              |                               |
| ALT               |                         |                | <i>0.3918</i>                 |
| ≤45               | 26                      | 22             |                               |
| > 45              | 18                      | 22             |                               |
| HBcAb             |                         |                | <i>0.3336</i>                 |
| positive          | 40                      | 37             |                               |
| negative          | 4                       | 7              |                               |
| AFP               |                         |                | <i>0.8172</i>                 |
| ≤25               | 13                      | 14             |                               |
| > 25              | 31                      | 30             |                               |
| HBsAg             |                         |                | <i>0.3674</i>                 |
| positive          | 36                      | 39             |                               |
| negative          | 8                       | 5              |                               |
| HCV               |                         |                | <i>0.3145</i>                 |
| with              | 1                       | 0              |                               |
| without           | 43                      | 44             |                               |
| TBIL              |                         |                | <i>0.0803</i>                 |
| ≤20               | 40                      | 34             |                               |
| > 20              | 4                       | 10             |                               |
| Cirrhosis Nodules |                         |                | <i>0.8301</i>                 |
| ≤3                | 25                      | 24             |                               |
| > 3               | 19                      | 20             |                               |
| Tumor Capsule     |                         |                | <i>0.1355</i>                 |
| with              | 26                      | 19             |                               |
| without           | 18                      | 25             |                               |
| Tumor Recurrence  |                         |                | <i>&lt;0.0001<sup>a</sup></i> |
| with              | 35                      | 17             |                               |
| without           | 9                       | 27             |                               |
| Tumor Number      |                         |                | <i>0.1564</i>                 |
| ≤1                | 39                      | 34             |                               |
| > 1               | 5                       | 10             |                               |

155 <sup>a</sup>*p* values less than .05 were considered statistically significant.

156

157 **Supplementary Table 8. Correlation between DDX24 expression and HCC**

158 **clinicopathologic features in 90 patients: Cohort 3.**

|                   | DDX24 expression levels |                | <i>P</i>                       |
|-------------------|-------------------------|----------------|--------------------------------|
|                   | high expression         | low expression |                                |
| Liver Cirrhosis   |                         |                |                                |
| with              | 39                      | 42             | <i>0.2918</i>                  |
| without           | 6                       | 3              |                                |
| ALT               |                         |                |                                |
| ≤45               | 31                      | 28             | <i>0.5057</i>                  |
| > 45              | 14                      | 17             |                                |
| HBcAb             |                         |                |                                |
| positive          | 42                      | 39             | <i>0.2918</i>                  |
| negative          | 3                       | 6              |                                |
| AFP               |                         |                |                                |
| ≤25               | 21                      | 17             | <i>0.3933</i>                  |
| > 25              | 24                      | 28             |                                |
| HBsAg             |                         |                |                                |
| positive          | 38                      | 33             | <i>0.1965</i>                  |
| negative          | 7                       | 12             |                                |
| HCV               |                         |                |                                |
| with              | 1                       | 1              | <i>&gt; 0.9999</i>             |
| without           | 44                      | 44             |                                |
| TBIL              |                         |                |                                |
| ≤20               | 38                      | 37             | <i>0.7773</i>                  |
| > 20              | 7                       | 8              |                                |
| Cirrhosis Nodules |                         |                |                                |
| ≤3                | 23                      | 33             | <i>0.0297<sup>a</sup></i>      |
| > 3               | 22                      | 12             |                                |
| Tumor Capsule     |                         |                |                                |
| with              | 18                      | 24             | <i>0.2049</i>                  |
| without           | 27                      | 21             |                                |
| Tumor Recurrence  |                         |                |                                |
| with              | 34                      | 15             | <i>&lt; 0.0001<sup>a</sup></i> |
| without           | 11                      | 30             |                                |
| Tumor Number      |                         |                |                                |
| ≤1                | 38                      | 41             | <i>0.3343</i>                  |
| > 1               | 7                       | 4              |                                |

159 <sup>a</sup>*p* values less than .05 were considered statistically significant.

160

161

162 **Supplementary Table 9. The half-time of LAMB1 mRNA in each group**

| HCC cell lines  | Half-time (hours) | <i>p</i> value |
|-----------------|-------------------|----------------|
| Hep3B NC        | > 10              |                |
| Hep3B shDDX24-1 | 2.613±0.1291      | < 0.0001       |
| Hep3B shDDX24-2 | 3.948±0.3587      | < 0.0001       |

163

164

165

166

167

168 **Supplementary Table 10. The five-year survival rate and average survival time**

169 **(months).**

| Protein expression level | Five-year survival rate (Ave, OS by months) |
|--------------------------|---------------------------------------------|
| DDX24 low                | 56.52% (60.64)                              |
| DDX24 high               | 19.57% (32.64)                              |
| LAMB1 low                | 67.39% (47.85)                              |
| LAMB1 high               | 6.52% (18.65)                               |
| DDX24 low, LAMB1 low     | 76.67% (52.63)                              |
| DDX24 high, LAMB1 high   | 3.33% (16.77)                               |

170

171

172

173

174

175 **Supplementary Table 11. The b and y values of MALDI-TOF/TOF mass**  
 176 **spectrometry**

| Ion Mass | D        | I        | L        | R        | N        | V        | R        |
|----------|----------|----------|----------|----------|----------|----------|----------|
| b+       | 116.0342 | 229.1183 | 342.2023 | 498.3034 | 612.3464 | 711.4148 |          |
| b++      | 58.207   | 115.0628 | 171.6048 | 249.6554 | 306.6768 | 356.2110 |          |
| y++      |          | 770.4995 | 657.4155 | 544.3314 | 388.2303 | 274.1874 | 175.1190 |
| y++      |          | 385.7534 | 329.2114 | 272.6693 | 194.6188 | 137.5973 | 88.0631  |

177

### Short Tandem Repeat (STR) Profile Report in Hepatoma Cell Lines

178 STR report for L02: Percent match between the sample and the database profile:

179 100%.

180

181

STR Profile:

| Genetic Site | Customer sample |      | ExPASy |      |
|--------------|-----------------|------|--------|------|
|              | L-02            |      | L-02   |      |
| Amelogenin   | X               | X    | X      | X    |
| CSF1PO       | 10              | 10   | 10     | 10   |
| D13S317      | 13.3            | 13.3 | 13.3   | 13.3 |
| D16S539      | 9               | 10   | 9      | 10   |
| D5S818       | 11              | 12   | 11     | 12   |
| D7S820       | 12              | 12   | 12     | 12   |
| TH01         | 7               | 7    | 7      | 7    |
| TPOX         | 12              | 12   | 12     | 12   |
| vWA          | 16              | 18   | 16     | 18   |

182

183

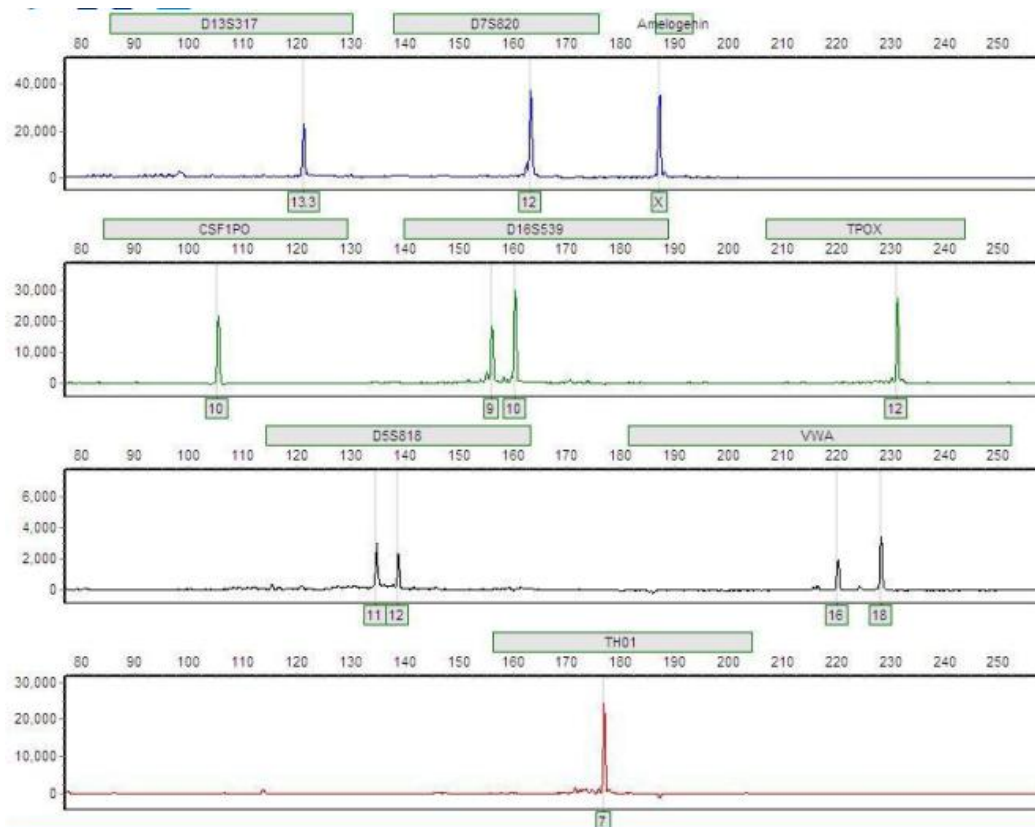

184

185 STR report for SNU449: Percent match between the sample and the database

186 profile: 94.4%.

187

188 STR Profile:

| Genetic Site | Customer sample |    | ATCC    |    |
|--------------|-----------------|----|---------|----|
|              | SNU-449         |    | SNU-449 |    |
| Amelogenin   | X               | X  | X       | Y  |
| CSF1PO       | 11              | 11 | 11      | 11 |
| D13S317      | 9               | 9  | 9       | 9  |
| D16S539      | 9               | 9  | 9       | 9  |
| D5S818       | 10              | 10 | 10      | 10 |
| D7S820       | 8               | 13 | 8       | 13 |
| TH01         | 6               | 9  | 6       | 9  |
| TPOX         | 11              | 11 | 11      | 11 |
| vWA          | 14              | 16 | 14      | 16 |

189

190

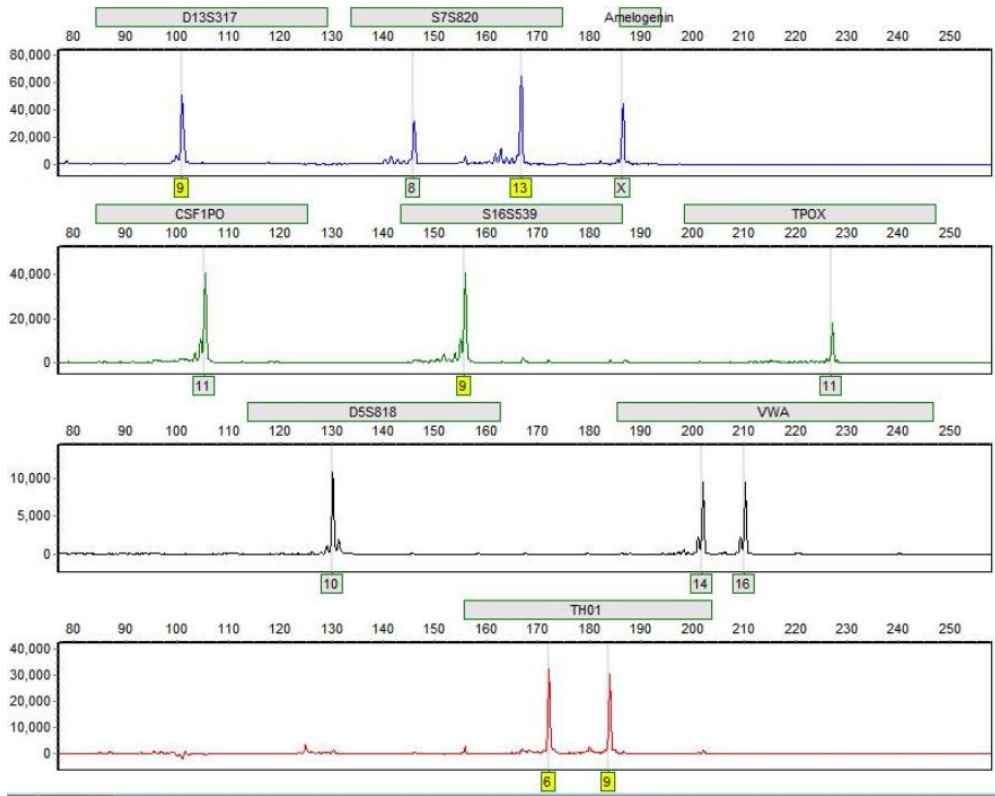

191

192



193 STR report for Huh7: Percent match between the sample and the database

194 profile: 94.4%.

195 STR Profile:  
196

| Genetic Site | Customer sample |    | JCRB  |    |
|--------------|-----------------|----|-------|----|
|              | HUH-7           |    | HUH-7 |    |
| Amelogenin   | X               | X  | X     | X  |
| CSF1PO       | 11              | 11 | 11    | 11 |
| D13S317      | 10              | 11 | 10    | 11 |
| D16S539      | 10              | 10 | 10    | 10 |
| D5S818       | 11              | 12 | 12    | 12 |
| D7S820       | 11              | 11 | 11    | 11 |
| THO1         | 7               | 7  | 7     | 7  |
| TPOX         | 8               | 11 | 8     | 11 |
| vWA          | 16              | 18 | 16    | 18 |

197  
198

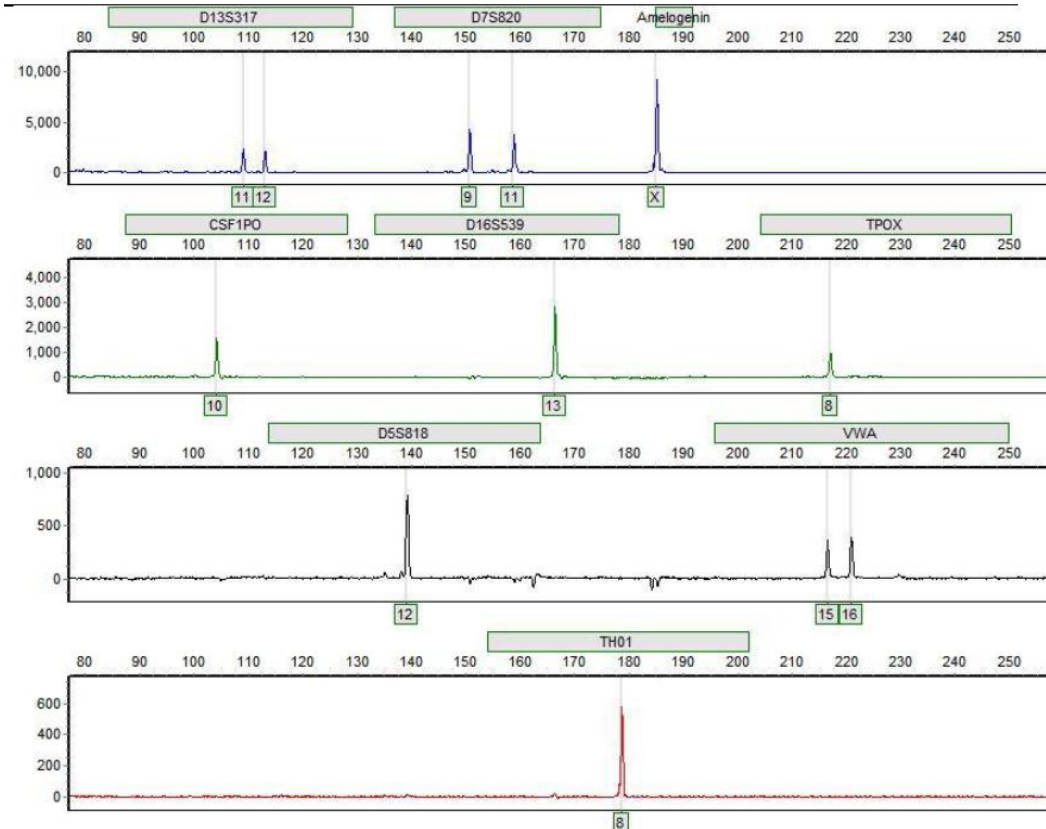

199  
200

201 STR report for PLC/PRF/5: Percent match between the sample and the database

202 profile: 100%.

203

204

STR Profile:

| Genetic Site | Customer sample |    | ATCC      |    |
|--------------|-----------------|----|-----------|----|
|              | PLC/PRF/5       |    | PLC/PRF/5 |    |
| Amelogenin   | X               | X  | X         | X  |
| CSF1PO       | 10              | 10 | 10        | 10 |
| D13S317      | 11              | 12 | 11        | 12 |
| D16S539      | 13              | 13 | 13        | 13 |
| D5S818       | 12              | 12 | 12        | 12 |
| D7S820       | 9               | 11 | 9         | 11 |
| TH01         | 8               | 8  | 8         | 8  |
| TPOX         | 8               | 8  | 8         | 8  |
| vWA          | 15              | 16 | 15        | 16 |

205

206

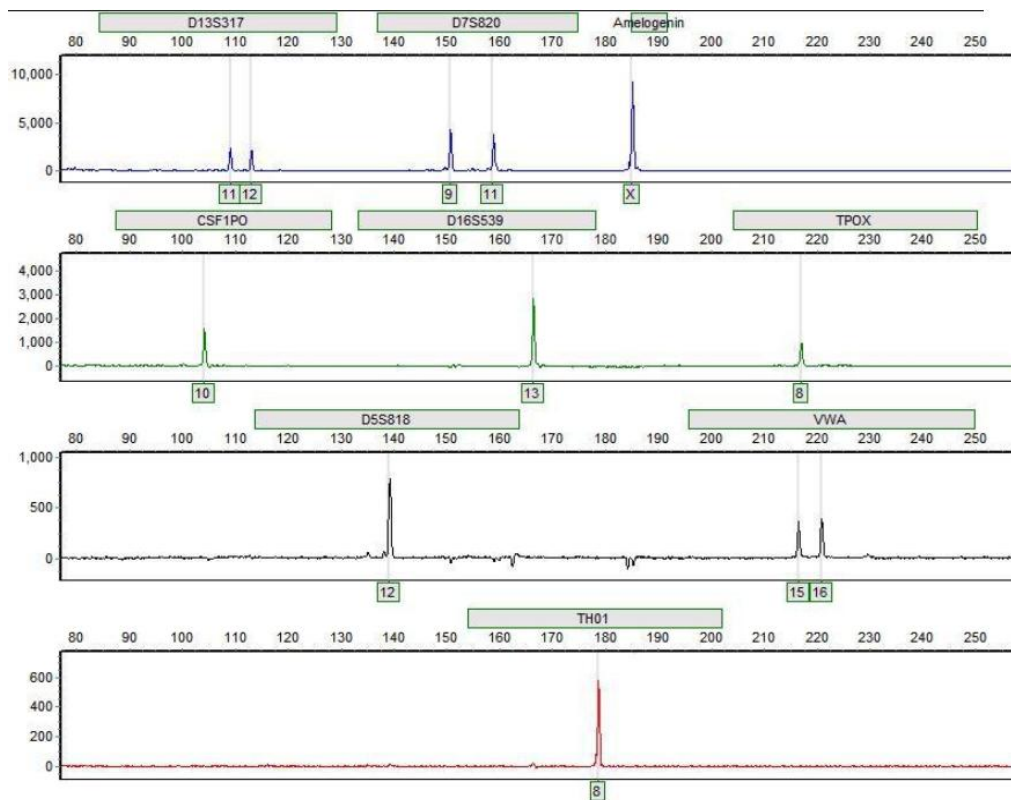

207

208

209

210

211 STR report for SNU398: Percent match between the sample and the database

212 profile: 100%.

213

214 STR Profile:

| Genetic Site | Customer sample |    | ATCC    |    |
|--------------|-----------------|----|---------|----|
|              | SNU-398         |    | SNU-398 |    |
| Amelogenin   | X               | Y  | X       | Y  |
| CSF1PO       | 13              | 13 | 13      | 13 |
| D13S317      | 11              | 11 | 11      | 11 |
| D16S539      | 10              | 14 | 10      | 14 |
| D5S818       | 12              | 12 | 12      | 12 |
| D7S820       | 10              | 11 | 10      | 11 |
| THO1         | 7               | 9  | 7       | 9  |
| TPOX         | 11              | 11 | 11      | 11 |
| vWA          | 17              | 18 | 17      | 18 |

215

216

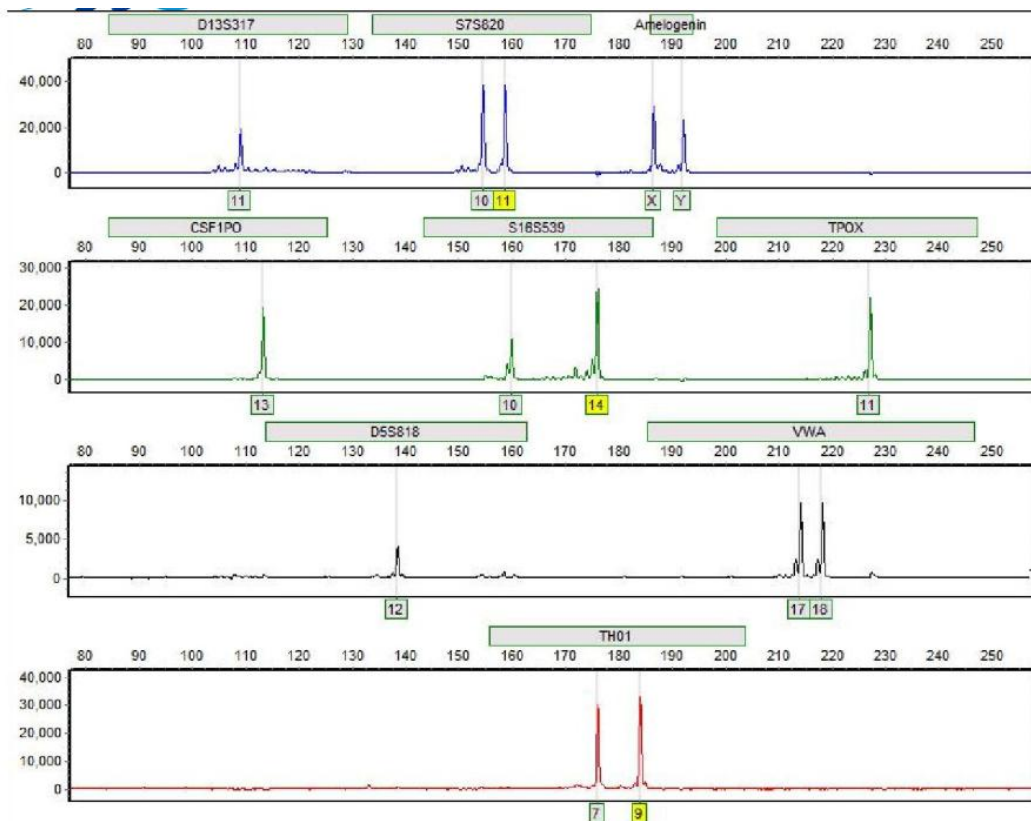

217

218

219

220

221 **STR report for Hep3B: Percent match between the sample and the database**

222 **profile: 98%.**

223

224

STR Profile:

| Marker  | Hep3B   |         |         |         | ATCC    |         |         |
|---------|---------|---------|---------|---------|---------|---------|---------|
|         | Allele1 | Allele2 | Allele3 | Allele4 | Allele1 | Allele2 | Allele3 |
| D5S818  | 13      | 13      |         |         | 13      | 13      |         |
| D13S317 | 12      | 14      |         |         | 12      | 14      |         |
| D7S820  | 8       | 8       |         |         | 8       | 10      |         |
| D16S539 | 10      | 10      |         |         | 10      | 10      |         |
| VWA     | 17      | 17      |         |         | 17      | 17      |         |
| TH01    | 6       | 7       |         |         | 6       | 7       |         |
| AMEL    | X       | X       |         |         | X       | X       |         |
| TPOX    | 9       | 9       |         |         | 9       | 9       |         |
| CSF1PO  | 8       | 8       |         |         | 8       | 8       |         |
| D12S391 | 17      | 17      |         |         |         |         |         |
| FGA     | 18      | 18      |         |         |         |         |         |
| D2S1338 | 21      | 25      |         |         |         |         |         |
| D21S11  | 30      | 31      |         |         |         |         |         |
| D18S51  | 20      | 20      |         |         |         |         |         |
| D8S1179 | 12      | 12      |         |         |         |         |         |
| D3S1358 | 15      | 15      |         |         |         |         |         |
| D6S1043 | 12      | 17      |         |         |         |         |         |
| PENTAE  | 5       | 16      |         |         |         |         |         |
| D19S433 | 12.2    | 14      |         |         |         |         |         |
| PENTAD  | 12      | 14      |         |         |         |         |         |

225

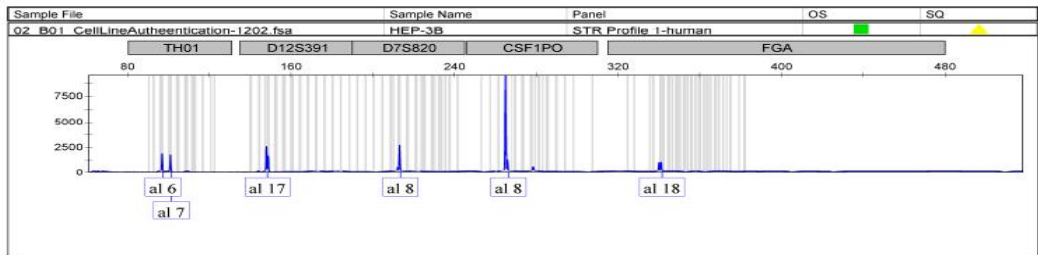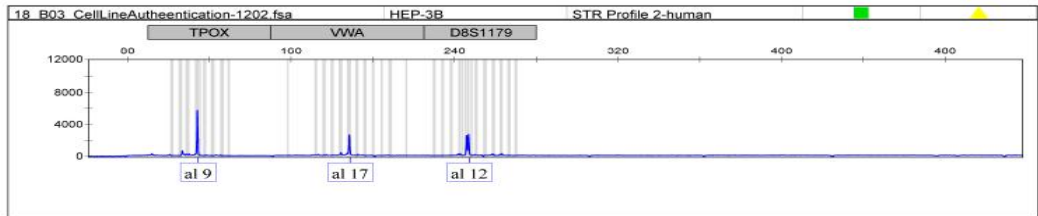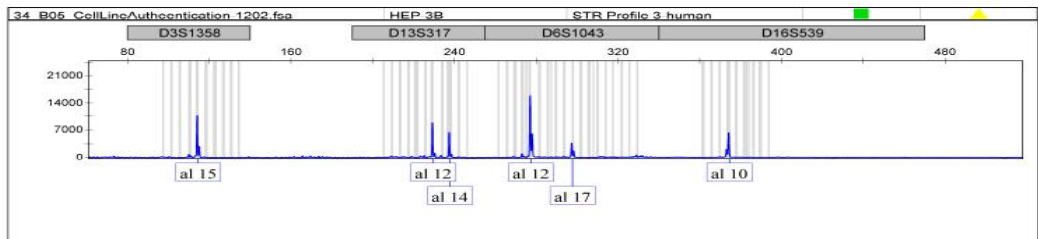

226  
227

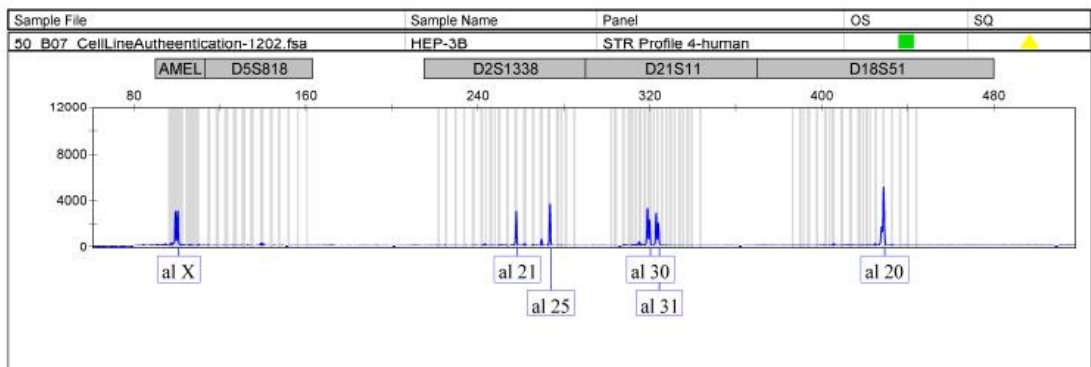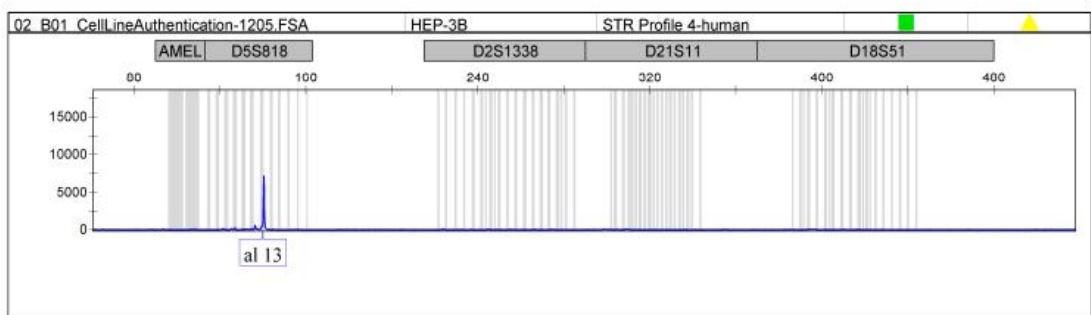

228  
229  
230  
231  
232  
233  
234  
235  
236
